# Supplementary material for: Efficacy of Combination Therapy with Lenvatinib and Radioactive Iodine in Thyroid Cancer Preclinical Model
Source: Int J Mol Sci. 2022 Aug 30;23(17):9872. doi: 10.3390/ijms23179872 (PMC9456011; doi:10.3390/ijms23179872)
Supplement: Supplementary file 1 [file ijms-23-09872-s001.zip › ijms-1872128-supplementary.pdf]

**Title**

Efficacy of Combination Therapy with Lenvatinib and Radioactive Iodine in Thyroid Cancer Preclinical Model

Kensuke Suzuki <sup>1,\*</sup>, Hiroshi Iwai <sup>1</sup>, Keita Utsunomiya <sup>2</sup>, Yumiko Kono <sup>2</sup>, Tadashi Watabe <sup>3</sup>, Yoshiki Kobayashi <sup>1</sup>, Dan Van Bui <sup>1</sup>, Shunsuke Sawada <sup>1</sup>, Yasutaka Yun <sup>1</sup>, Akitoshi Mitani <sup>1</sup>, Kenta Fukui <sup>1</sup>, Haruka Sakai <sup>1</sup>, Hanh Hong Chu <sup>1</sup>, Nguyen Manh Linh <sup>1</sup>, Noboru Tanigawa <sup>2</sup> and Akira Kanda <sup>1</sup>

**Affiliations**

<sup>1</sup> Department of Otolaryngology, Head and Neck Surgery, Kansai Medical University, Hirakata 573-1010, Osaka, Japan

<sup>2</sup> Department of Radiology, Kansai Medical University, Hirakata 573-1010, Osaka, Japan

<sup>3</sup> Department of Nuclear Medicine and Tracer Kinetics, Graduate School of Medicine, Osaka University, Suita 565-0871, Osaka, Japan

\* Correspondence: [suzukken@hirakata.kmu.ac.jp](mailto:suzukken@hirakata.kmu.ac.jp); Tel.: +81-72-804-0101 (ext. 56490)

**A**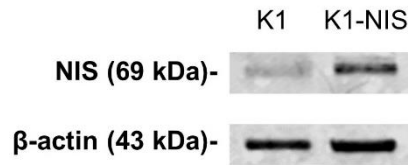**B**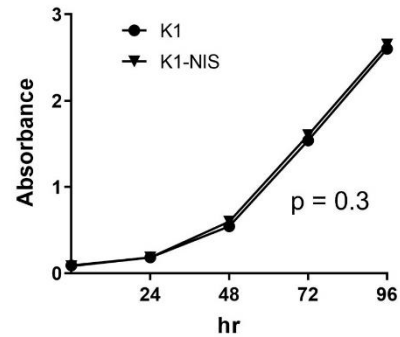

**Supplementary Figure S1. Immunoblot and cell proliferation assay of thyroid cancer cell lines.** (A) Sodium iodide symporter (NIS) protein expression in K1 and NIS stably transfected K1 cell lines (K1-NIS). Collected cellular proteins from K1 or K1-NIS cells were electrophoresed and transferred to a PVDF membrane. The membranes were incubated with NIS and  $\beta$ -actin antibodies. (B) Cell proliferation assay of K1 and K1-NIS cells. Cells ( $2 \times 10^3$  cells/well) were seeded and cultured in 96-well culture plates for 0, 24, 48, 72, or 96 h. WST-8 at 10  $\mu$ l was added to the wells, the cells were incubated for 4 h at 5%  $\text{CO}_2$  and 37°C, and then absorbance was measured at a wavelength of 450 nm ( $n = 4$ ). Data represent means  $\pm$  SEM.

### FTC-133

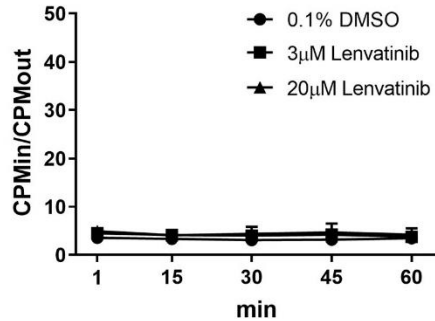

**Supplementary Figure S2. Intracellular uptake of radioiodine after lenvatinib treatment *in vitro*.** The intracellular accumulation ratio (CPMin/CPMout) of  $^{125}\text{I}$  in FTC-133 cells treated with 0.1% DMSO or 3 and 20  $\mu\text{M}$  lenvatinib for 48 h. Cells at a concentration of  $1\text{--}2 \times 10^6$  cells/mL were obtained at 1, 15, 30, 45, and 60 min after adding 370 kBq of  $^{125}\text{I}$ , and the ratio of radioactivity concentration inside the cell to that found in the supernatant was calculated ( $n = 5$ ). Data represent means  $\pm$  SEM.
